# Supplementary material for: Genome-Wide Survey Indicates Diverse Physiological Roles of Dendrobium officinale Calcium-Dependent Protein Kinase Genes
Source: MDPI journal article supplement (doi:10.3390/ijms23031298), 2022-01-24
Supplement: s1 [file s1]

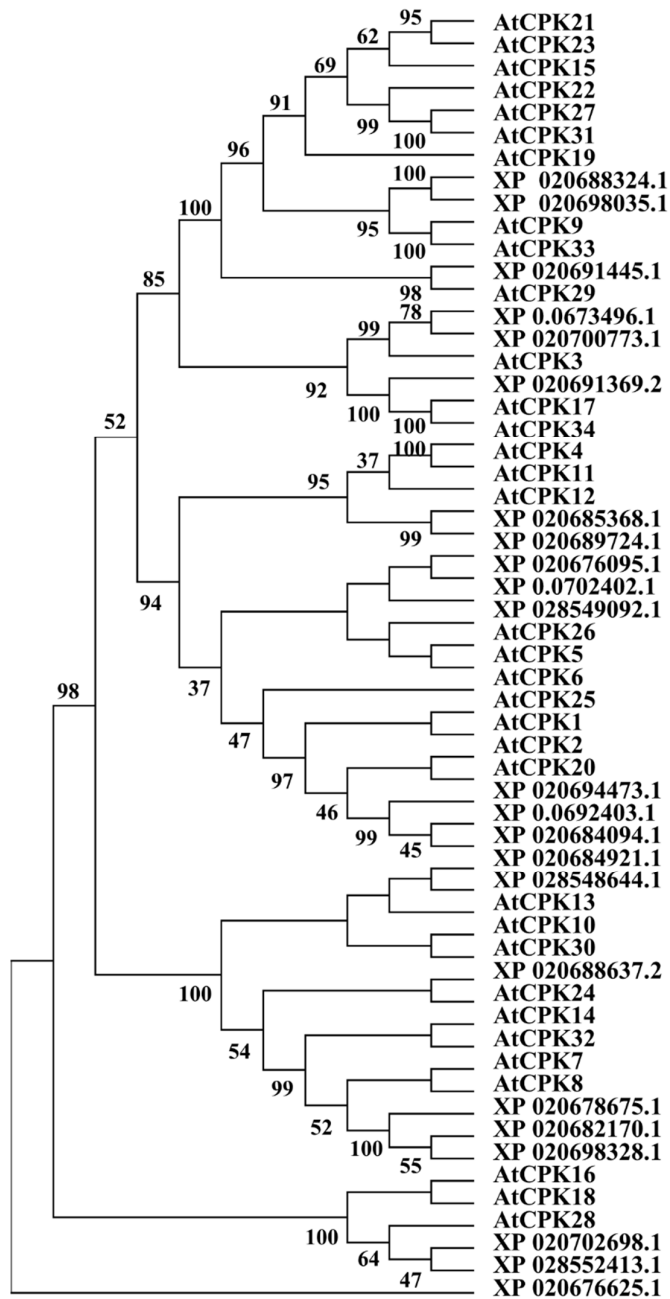

**Figure S1.** Phylogenetic relationship of CDPKs in *Dendrobium officinale* and *Arabidopsis thaliana*. A neighbor-joining tree was created using full-length protein sequences of CDPKs using MEGAX 7.0 with 1000 bootstrap replicates. Numbers beside branches indicate bootstrap support.

Table S1. Identity of unnamed CDPK in *D.officinale* and *A.thaliana*

| Gene name in<br><i>D.officinale</i> | Gene name in<br><i>A.thaliana</i> | Identity(%) | Gene name in<br>article |
|-------------------------------------|-----------------------------------|-------------|-------------------------|
| XP_020688324.1                      | AtCPK9                            | 72.83       | DoCDPK9-2               |
| XP_020698035.1                      | AtCPK9                            | 72.95       | DoCDPK9-1               |
| XP_020688324.1                      | AtCPK33                           | 70.79       |                         |
| XP_020698035.1                      | AtCPK33                           | 72.71       |                         |
| XP_020691445.1                      | AtCPK3                            | 72.02       | DoCDPK3-1               |
| XP_020700773.1                      | AtCPK3                            | 63.47       | DoCDPK3-2               |
| XP_020691369.2                      | AtCPK34                           | 73.47       | DoCDPK34                |
| XP_020691369.2                      | AtCPK17                           | 72.97       |                         |
| XP_020685368.1                      | AtCPK12                           | 72.85       |                         |
| XP_020685368.1                      | AtCPK11                           | 74          | DoCDPK11-1              |
| XP_020685368.1                      | AtCPK4                            | 72.78       |                         |
| XP_020689724.1                      | AtCPK12                           | 72.69       |                         |
| XP_020689724.1                      | AtCPK11                           | 72.95       | DoCDPK11-2              |
| XP_020689724.1                      | AtCPK4                            | 71.54       |                         |
| XP_020676095.1                      | AtCPK26                           | 74.42       |                         |
| XP_020676095.1                      | AtCPK5                            | 77.36       |                         |
| XP_020676095.1                      | AtCPK6                            | 79.17       | DoCDPK6-1               |
| XP_020702402.1                      | AtCPK26                           | 73.29       |                         |
| XP_020702402.1                      | AtCPK5                            | 74.08       |                         |
| XP_020702402.1                      | AtCPK6                            | 76.03       | DoCDPK6-3               |
| XP_028549092.1                      | AtCPK26                           | 72.57       |                         |
| XP_028549092.1                      | AtCPK5                            | 75.40       |                         |
| XP_028549092.1                      | AtCPK6                            | 77.01       | DoCDPK6-2               |
| XP_020694473.1                      | AtCPK20                           | 77.01       | DoCDPK20-1              |
| XP_020684094.1                      | AtCPK20                           | 68.17       | DoCDPK20-3              |
| XP_028550805.1                      | AtCPK20                           | 69.05       | DoCDPK20-2              |
| XP_020692403.1                      | AtCPK20                           | 68.01       | DoCDPK20-4              |
| XP_020684921.1                      | AtCPK13                           | 79.67       | DoCDPK13-1              |
| XP_028548644.1                      | AtCPK13                           | 48.11       | DoCDPK13-2              |
| XP_020678675.1                      | AtCPK7                            | 75.46       | DoCDPK7                 |
| XP_020678675.1                      | AtCPK8                            | 75.19       |                         |
| XP_020682170.1                      | AtCPK7                            | 76.02       |                         |
| XP_020682170.1                      | AtCPK8                            | 76.72       | DoCDPK8-2               |
| XP_020698328.1                      | AtCPK7                            | 77.84       | DoCDPK8-1               |
| XP_020698328.1                      | AtCPK8                            | 77.84       |                         |
| XP_020702698.1                      | AtCPK16                           | 70.40       |                         |
| XP_020702698.1                      | AtCPK18                           | 66.43       |                         |
| XP_020702698.1                      | AtCPK28                           | 74.53       | DoCDPK28-1              |
| XP_020692403.1                      | AtCPK16                           | 25.29       |                         |
| XP_020692403.1                      | AtCPK18                           | 24.48       |                         |

|                |         |       |            |
|----------------|---------|-------|------------|
| XP_020692403.1 | AtCPK28 | 26.50 | DoCDPK28-2 |
| XP_028552413.1 | AtCPK16 | 73.78 | DoCDPK16   |
| XP_028552413.1 | AtCPK18 | 66.56 |            |
| XP_028552413.1 | AtCPK28 | 72.50 |            |

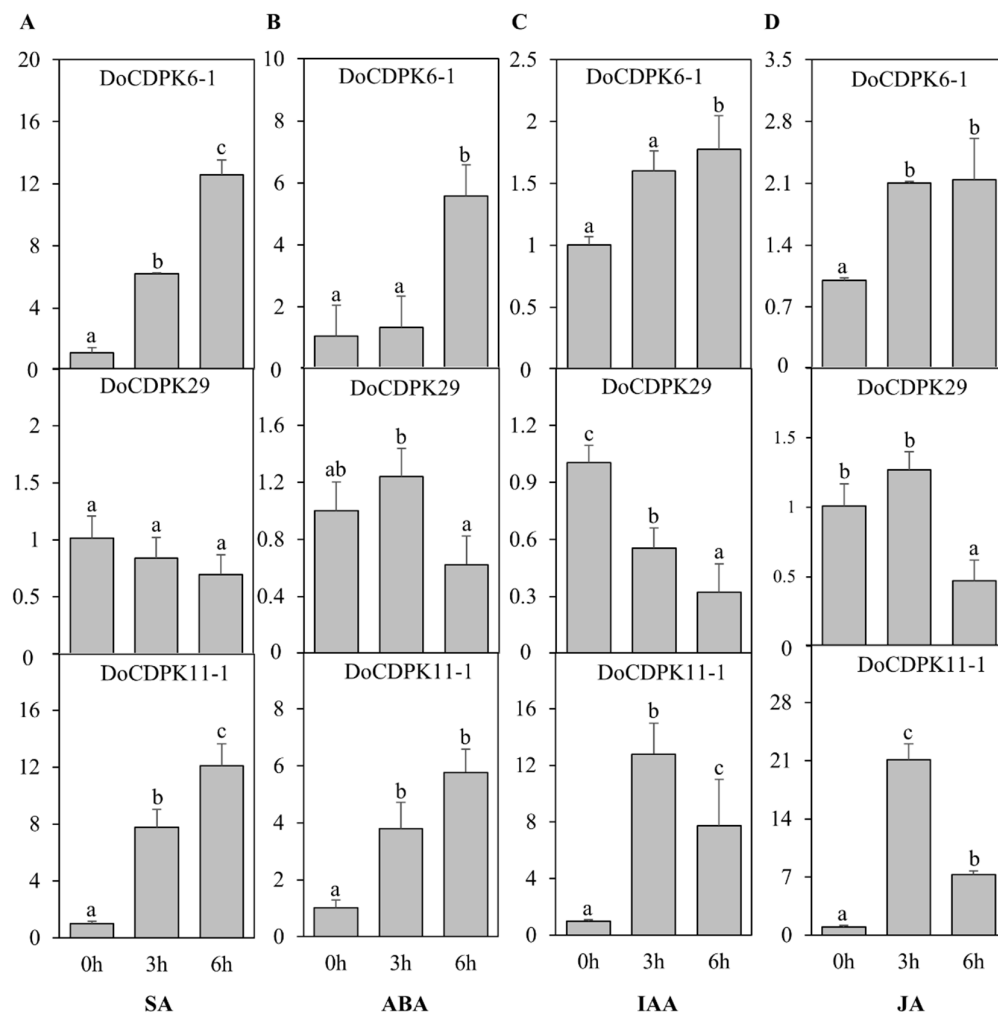

**Figure S2.** Results of quantitative real-time PCR (q-PCR) of DoCDPK6-1, 11-1 and 29 with SA, ABA, IAA and JA treatment at 0, 3 and 6 hours. (A) Results of quantitative real-time PCR (q-PCR) of DoCDPK6-1, 11-1 and 29 with SA treatment at 0, 3 and 6 hours. (B) Results of quantitative real-time PCR (q-PCR) of DoCDPK6-1, 11-1 and 29 with ABA treatment at 0, 3 and 6 hours. (C) Results of quantitative real-time PCR (q-PCR) of DoCDPK6-1, 11-1 and 29 with IAA treatment at 0, 3 and 6 hours. (D) Results of quantitative real-time PCR (q-PCR) of DoCDPK6-1, 11-1 and 29 with JA treatment at 0, 3 and 6 hours. Means denoted by different letters are significantly ( $P < 0.05$ ).

**Table S2.** Primers used for q-PCR

| Gene name | Forward primer (5'-3') | Reverse primer (5'-3')  |
|-----------|------------------------|-------------------------|
| DoCDPK6-1 | CCCCACTACAATCCGTGTCC   | CCCCACTACAATCCGTGTCC    |
| DoCDPK12  | CAATCGTTGCGGTCGTTGAG   | AGGGGCTTCCCACTACATCA    |
| DoCDPK29  | TTCAGCATCTTACGGGGCAA   | GCTCCGAATAGCTCCCTTG     |
| Actin     | GAGACCTTCAATGCCCTGCTAT | GGCTGACACCATCACCAGAATCC |

**Table S3.** Primers used for yeast two-hybrid assay.

| Gene name  | Forward primer (5'-3')                | Reverse primer (5'-3')                  |
|------------|---------------------------------------|-----------------------------------------|
| DoCDPK9-1  | GAGGACCTGCATATGATGGGAGCTTGCTGCGGCAAA  | CAGGTCGACGGATCCAATAATCTTAGCTGGTTGCTGAAA |
| DoCDPK9-2  | GAGGACCTGCATATGATGGGATCTTGCTGCGGAAAA  | CAGGTCGACGGATCCGGCATGCCTAGCTGGTTGCGGAAG |
| DoCDPK20-1 | GAGGACCTGCATATGATGGGTAACAACGCGTCGGT   | CAGGTCGACGGATCCTTTTGCTGGCTCTTCTGCCC     |
| DoCDPK20-2 | GAGGACCTGCATATGATGGGGAACACTTGTGTCGG   | CAGGTCGACGGATCCGCCAACCTTCAAAGCTTCTCT    |
| DoCDPK20-3 | GAGGACCTGCATATGATGGGGAATACATGTGTGGTCC | CAGGTCGACGGATCCAAGCATCAGGGCCTCCCTAAG    |
| DoCDPK20-4 | GAGGACCTGCATATGATGGGAAATACATGTGTGGGCC | CAGGTCGACGGATCCAACAAGCCTCAAAGCCTCCCT    |
| DoRboh D   | GATTACGCTCATATGATGAAGAGATTGGGCGGCTCC  | GAGCTCGATGGATCCGAAGTTCTCCTTGTGAAAATC    |
| DoRboh H   | GATTACGCTCATATGATGGGATCAACGGCTACGTC   | GAGCTCGATGGATCCGAAGTTCTCCTTGTGAAAAT     |
| DoRboh F   | GATTACGCTCATATGATGAAGGGATTGCGACGCAC   | GAGCTCGATGGATCCGAATGCTCCTTGTGGAATC      |
